# Supplementary material for: Stomach curvature is generated by left-right asymmetric gut morphogenesis
Source: Oxford University Press journal article supplement (doi:10.1242/dev.143701), 2017-02-27
Supplement: dev143701supp.pdf [file dev143701supp.pdf]

## Antibodies

Primary antibodies used for immunohistochemistry include anti- $\beta$ -catenin (Santa Cruz, sc-7199, 1:100), anti- $\alpha$ -tubulin (Sigma, T9026, 1:1000), anti-aPKC (Santa Cruz, sc-216, 1:200), anti-integrin (Developmental Studies Hybridoma Bank, DSHB, , created by the NICHD of the NIH and maintained at The University of Iowa; 8C8, 1:1000), anti- $\gamma$ -tubulin (Abcam, ab27074, 1:1000), anti-phospho-histone H3 (pHH3; Millipore, 06-570, 1:500), anti-E-cadherin (DSHB, 5D3-c, 1:200) and anti-Par3 (Millipore, 07-330, 1:200). Secondary antibodies used were Alexa 488-conjugated goat anti-mouse IgG (Invitrogen, A11029; 1:2000) and/or Alexa 546-conjugated goat anti-rabbit IgG (Invitrogen, A11035; 1:2000). Nuclear staining was accomplished with TO-PRO-3 Iodide (T3605; 1:1000).

Antibodies used in Western blotting were rabbit anti-GFP (ThermoFisher, A6455, 1:1000), rabbit anti-GAPDH (Millipore, AB2302, 1:1000), and HRP-conjugated donkey anti-rabbit IgG (ThermoFisher, A16035, 1:10,000).

## Methodology and Statistics

To ensure adequate power, at least 30 *Xenopus* embryos were used for each group/condition in each experiment. Mouse sample size was dependent on litter size from two independent breedings.

For *Xenopus* loss- and gain-of-function studies, embryos from a single clutch were randomly allocated to control or experimental groups; each experiment was performed at least 3 times, using independent breedings, with similar results.

For both mouse and *Xenopus* studies, results were validated by an independent researcher blinded to group allocation.

For mouse morphometric measurements, 2-3 sections were analyzed from at least 2 embryos. For *Xenopus* morphometric measurements, 2-3 sections were analyzed from at least 3 embryos.

For most analyses, a one-way Anova with post-hoc Tukey honest significant difference (HSD) was calculated, validated with additional Scheffé, Bonferroni and Holm multiple comparisons.

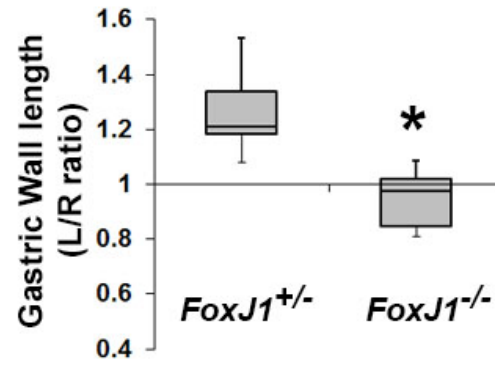

**Figure S1.** The normal left/right ratio of the lengths of the stomach walls is eliminated in E11.5 *FoxJ1*<sup>-/-</sup> mouse stomachs (\* denotes  $p < 0.01$ ).

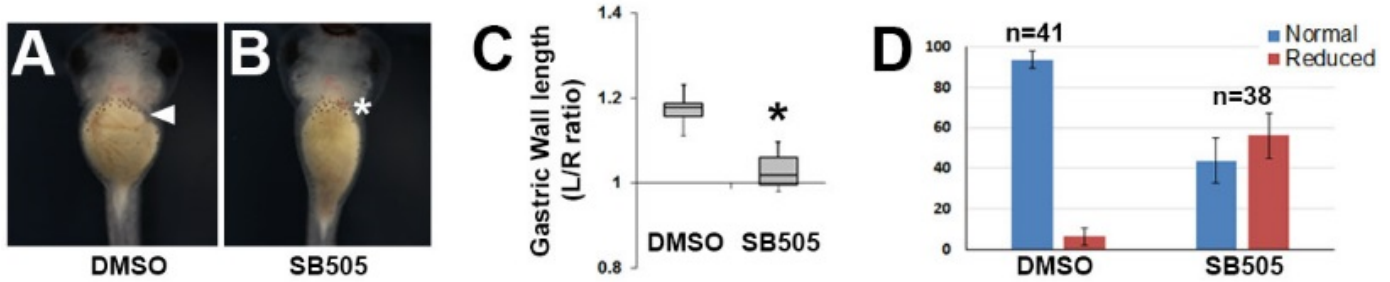

**Figure S2. SB505124 exposure inhibits stomach curvature.** Stage 19/20 frog embryos were exposed to DMSO (**A**) or 5 $\mu$ M SB505124 (**B**) through stage 42. **C**) The normal left/right (L/R) ratio of the lengths of the stomach walls is eliminated in SB505124-dosed embryos (\* denotes  $p < 0.01$ ). The graph (**D**) indicates the percentage of embryos in which the greater curvature of the stomach is normal (e.g., arrowhead in **A**) or reduced/absent (\* in **B**).

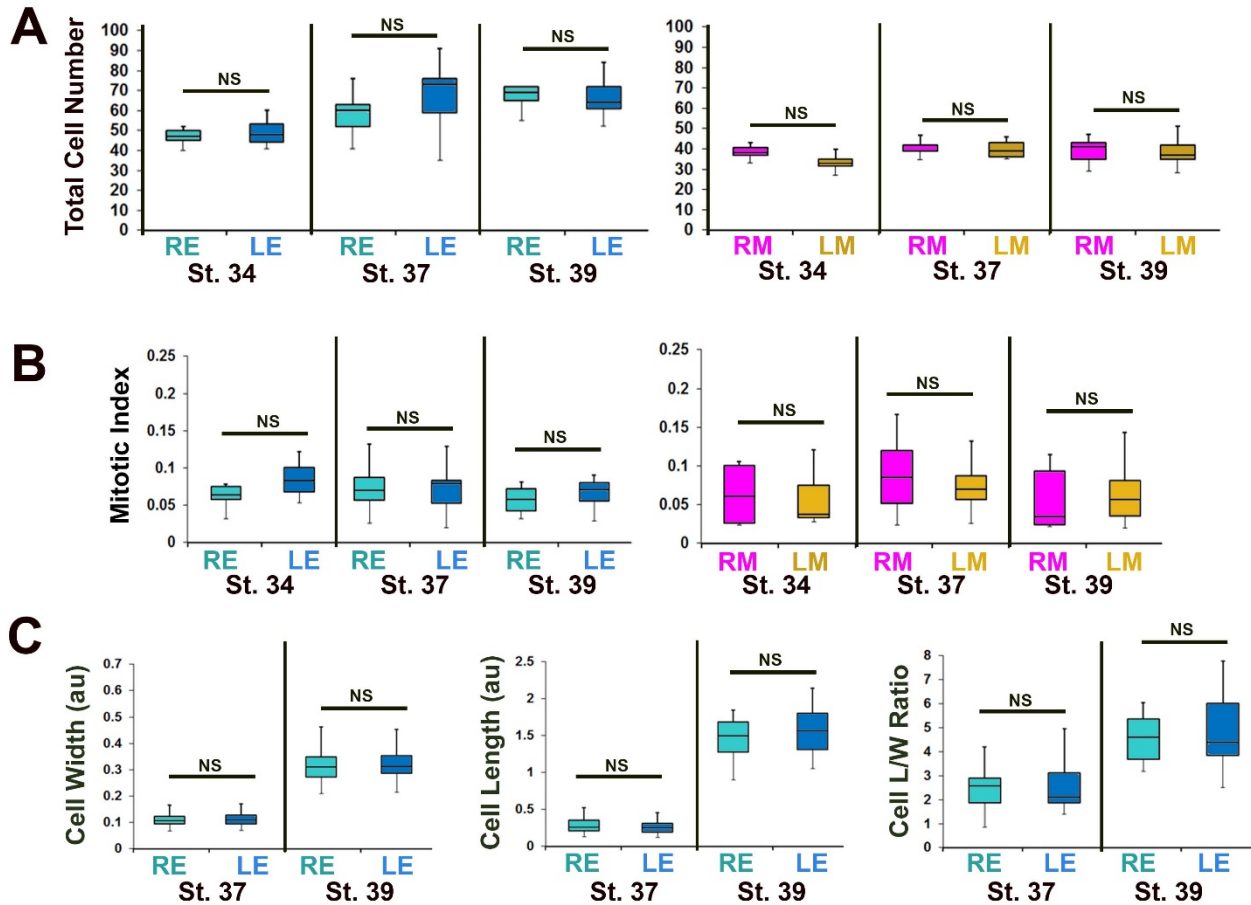

**Figure S3. Morphometric comparison of cell properties in the left and right stomach walls.** Sections of the developing stomach were immunohistochemically stained to reveal cell outlines or mitotic nuclei, and the indicated features were counted and/or measured at St. 34, 37 and 39, using at least 3 sections from each of 3 different embryos. At no stage are the total number of cells (**A**) or mitotic indices (**B**; number of pHH3+ cells/number of total cells) statistically different between the left and right sides. Likewise, there is no statistical difference in endoderm cell width, length or length/width (L/W) ratio between sides during curvature formation (**C**). RE, right endoderm; LE, left endoderm; RM, right mesoderm; LM, left mesoderm

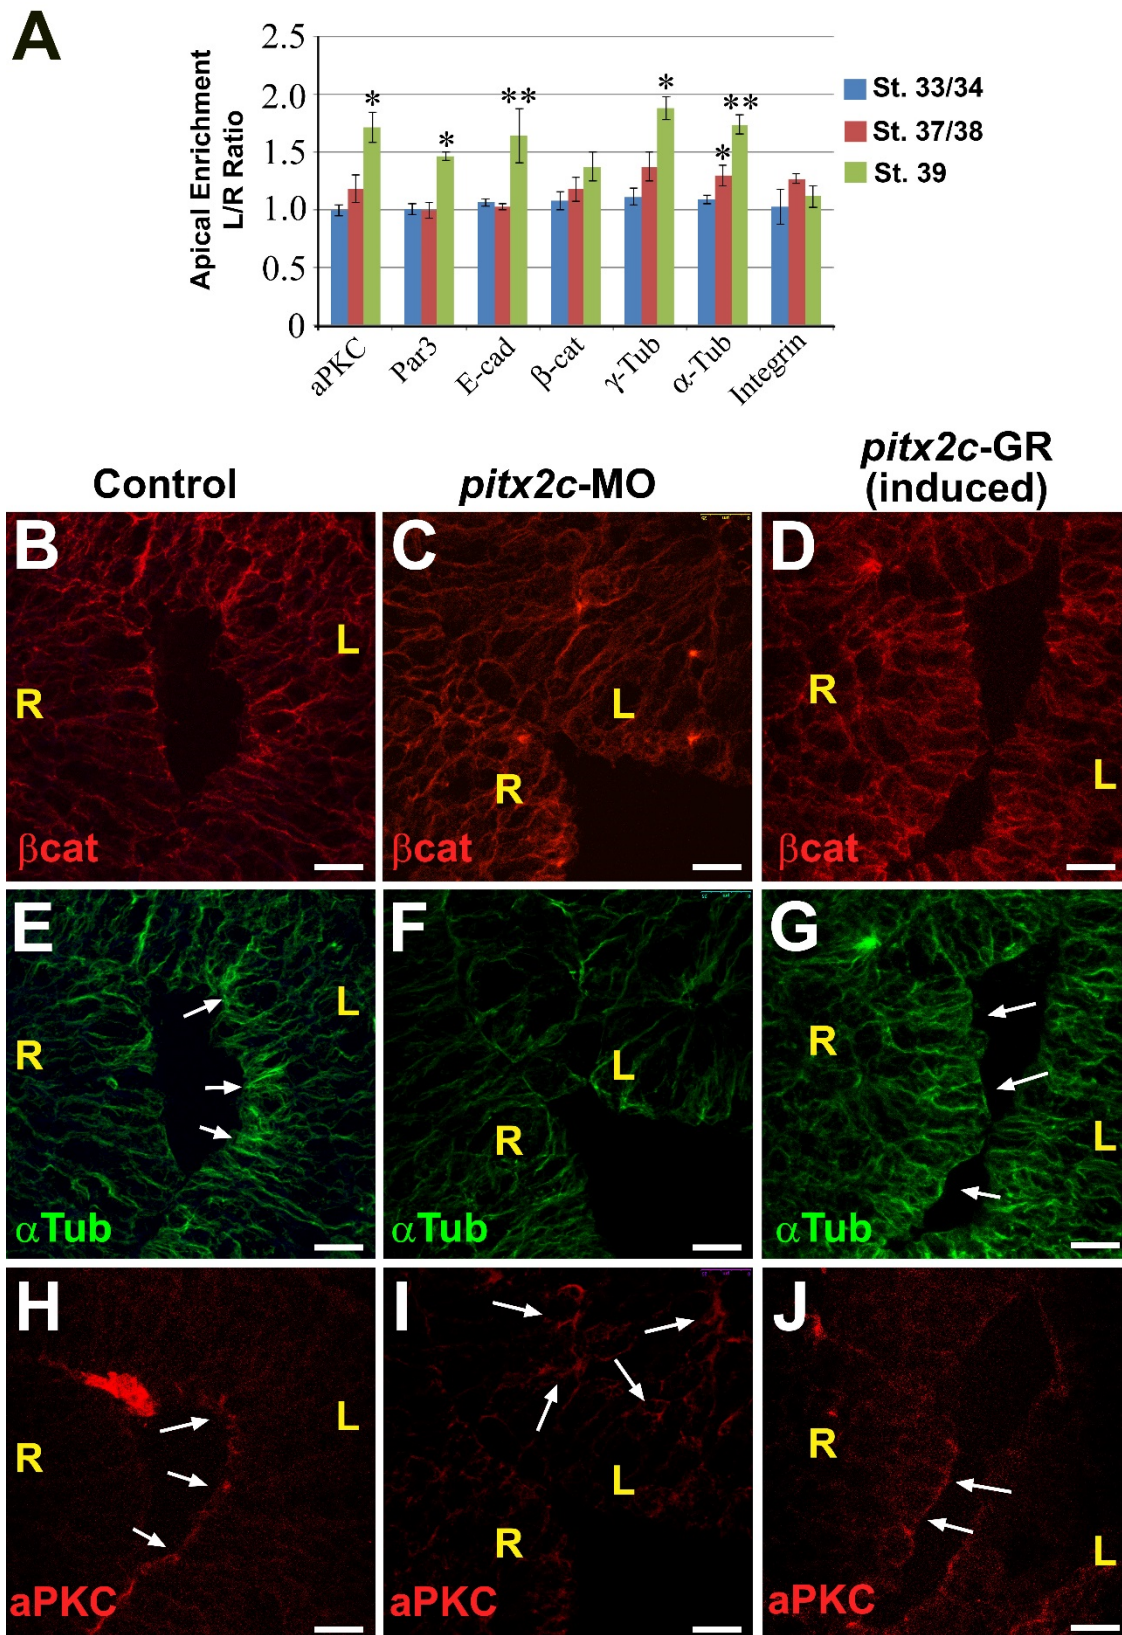

**Figure S4. Markers of apicobasal polarity become left-right asymmetric in the developing stomach.** The intensity of several markers of apical polarity, including aPKC, Par3, E-cadherin (E-cad),  $\alpha$ -tubulin ( $\alpha$ -tub) and  $\gamma$ -tubulin ( $\gamma$ -tub) were measured at the left and right surfaces of the frog stomach lumen at the indicated stages



using image J (**A**). The level of apical enrichment is represented as a ratio of left and right intensities measured in at least 3 sections of 3-5 different embryos. The left/right (L/R) ratios of all apical markers become significantly different by stage 39, while the L/R ratios of  $\beta$ -catenin ( $\beta$ -cat) and integrin are not significantly  $>1$ . **B-J**) High magnification images of sections through the Stage 39 stomach stained for  $\beta$ -catenin ( $\beta$ cat; red; **B-D**),  $\alpha$ -tubulin ( $\alpha$ tub; green; **E-G**), or atypical PKC (aPKC; red; **H-J**). Compared to control embryos (**B, E, H**), in which  $\alpha$ tub and aPKC are concentrated at the apical surface of the left stomach wall (arrowheads in **E, H**, respectively), MO depletion of Pitx2c (**C, F, I**) disrupts epithelial architecture (arrows in **I**). Meanwhile, dexamethasone-induction of Pitx2c activity (**D, G, J**) in the right wall ectopically polarizes the stomach endoderm, as indicated by ectopic regions of polarized epithelial architecture, correlating with enriched  $\alpha$ tub and ectopic aPKC at the apical surface (arrows in **G, J**). Scalebars = 25 $\mu$ M. Left (L), Right (R).





**Figure S5. CRISPR-Cas9 mediated editing of *pitx2c* gene perturbs stomach asymmetry.** *Xenopus* embryos were injected with 2 ng synthetic Cas9 mRNA plus 300 pg control *tyrosinase* (*tyr*) gRNA (**A**) or *pitx2c* gRNA (**B**), and allowed to develop until stage 42. The graph (**C**) indicates the percentage of embryos in which the greater curvature of the stomach is normal (arrowhead in **A**) or reduced/absent (\* in **B**) after injection with the *tyr* gRNA or two different *pitx2c* gRNAs (#1 and #2). **D**) Genomic DNA from 10 embryos injected with each gRNA was pooled and PCR amplified using exon 1-specific primers, and then tested for CRISPR/Cas9-induced mutations by T7 endonuclease I assay. The asterisk (\*) indicates the 500 bp amplicon not cut in un-injected or *tyr* gRNA-injected control embryos. Arrowheads indicate bands resulting from mismatches (inferred mutations) in amplicons cleaved by T7 endonuclease I. **E**) Sequencing of a subset of individual clones validates the presence of deleterious mutations in *pitx2c* gRNA injected embryos. For *pitx2c* gRNA #1, 9/17 mutations were likely nulls and 3/17 were predicted to result in compromised function; for *pitx2c* gRNA #2: 2/18 mutations were likely nulls and 4/17 were likely to result in compromised function. **F-N**) Sections through stomachs of Cas9 control and *pitx2c* gRNA (#1) injected embryos (Stage 39) were stained for integrin (green) and false color-coded as in Fig. 1 to highlight the relevant tissue layers (RE, right endoderm; LE, left endoderm; RM, right mesoderm; LM, left mesoderm). Controls show normal asymmetric expansion of the left stomach wall (**F**), but this is eliminated in embryos injected with *pitx2c* gRNA (**G-H**). Normal asymmetries in the lengths of the left and right stomach walls (**I**), and the widths of the endoderm (Endo) and mesoderm (Meso) layers (**J-K**), are also significantly perturbed by CRISPR-Cas editing of *pitx2c*; \* denotes  $p < 0.01$ . Compared to controls (**L**), left endoderm tissue architecture is severely disrupted, and apicobasal polarity is reduced (**M**), and/or disorganized (**N**) in embryos with CRISPR-mediated mutations in *pitx2c*; arrowheads indicate the expression of the apical marker aPKC (red). Scalebars= 100  $\mu$ M.

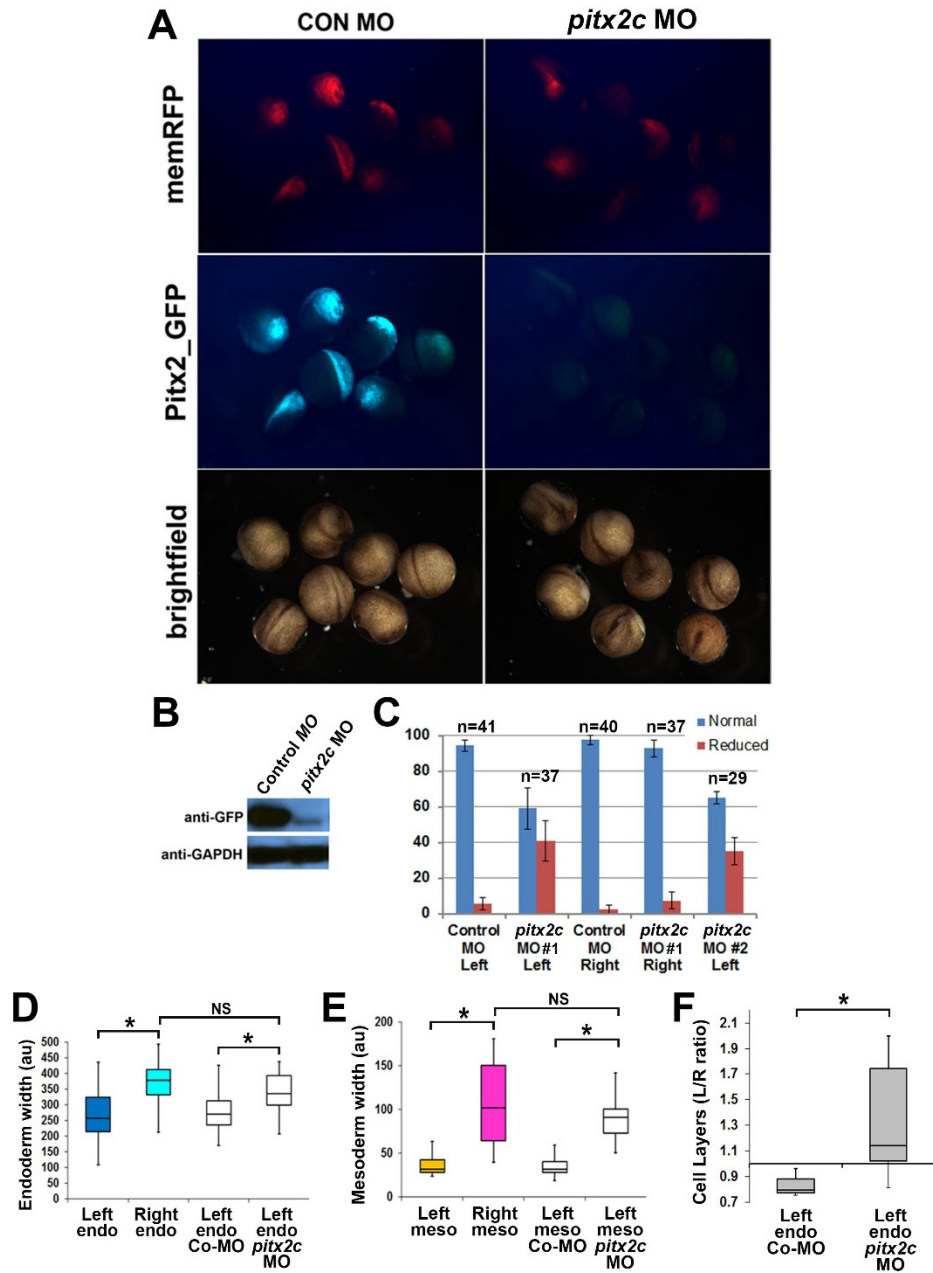

**Figure S6. Specificity and efficacy of the *pitx2c* MO.** **A**) *Xenopus* embryos (8-cell stage) were injected with 8 ng Control or *pitx2c* MO plus 200pg RFP mRNA and GFP mRNA (fused with *pitx2c* 5' UTR MO target site), and cultured until stage 20. Effective translation, indicated by GFP fluorescence, is visible in embryos injected with Control MO, but not with *Pitx2c* MO; RFP (which does not contain the *pitx2c* 5' UTR sequence) levels remain unaffected. **B**) Western blot confirms drastic reduction of GFP protein levels in embryonic extracts from *pitx2c*-MO- but not Control-MO-injected embryos. GAPDH, loading control. **C**) The graph indicates the frequency (percentage) of embryos in which the greater curvature of the stomach is normal or reduced/absent when Control MO or *pitx2c*-MO (#1) is targeted to either the left or right side. A second, independent MO (*pitx2c* MO #2) confirmed the result. While injection of Control MO has no effect on the relative thickness of the left endoderm (**D**) or mesoderm (**E**), *pitx2c*-MO-injected tissues are similar in thickness to the normal (non-*pitx2c*-expressing) right tissues (i.e., not significantly different, NS). **F**) The L/R ratio of endoderm cell layers is significantly increased in *pitx2c*-MO-injected stomachs, compared to Control-MO. \* denotes  $p < 0.01$

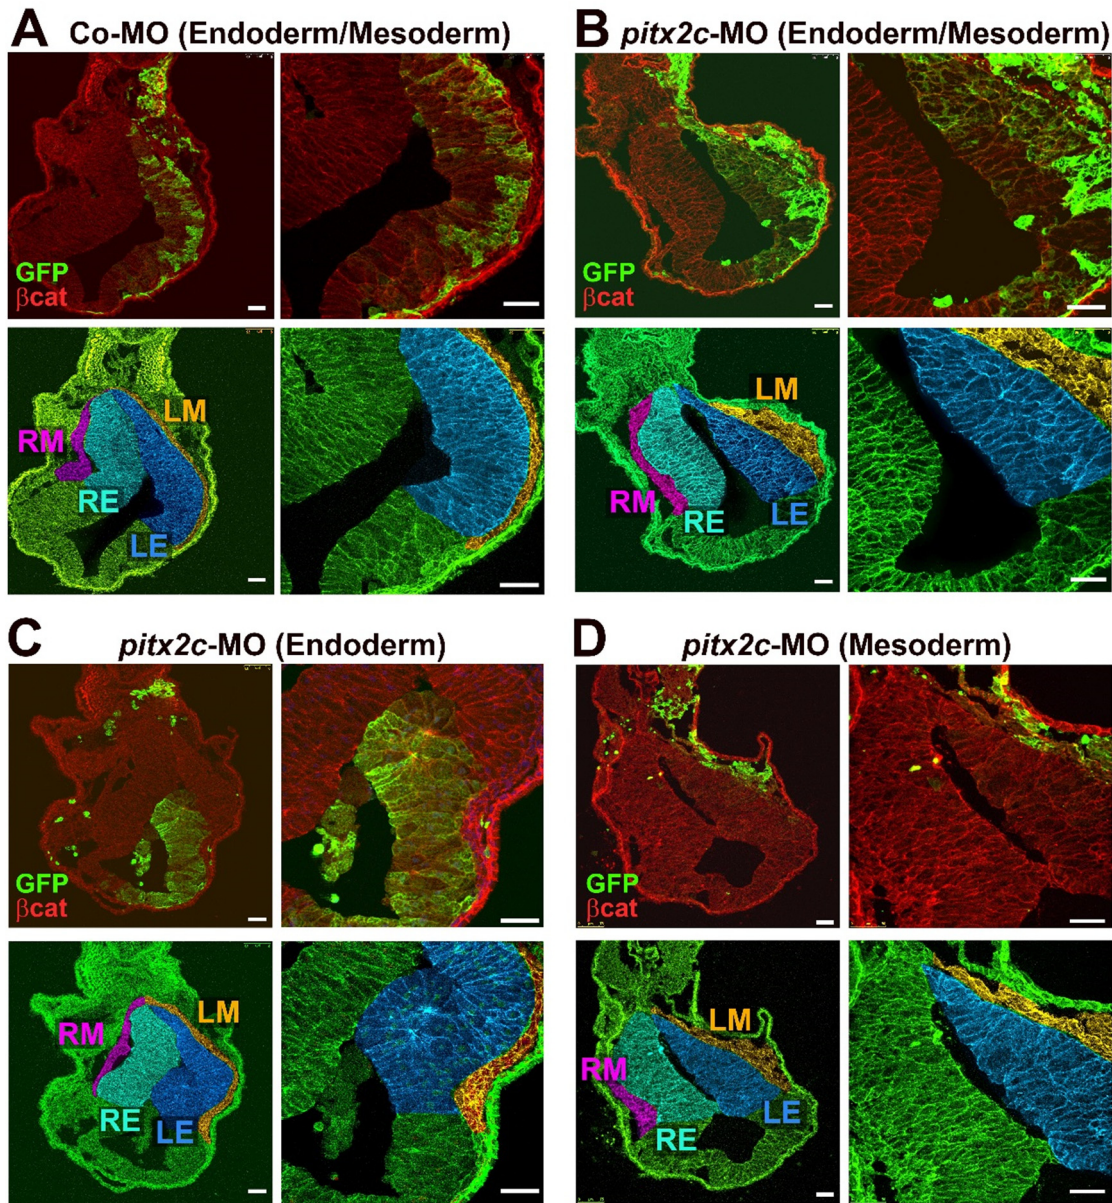

**Figure S7. Reciprocal endoderm-mesoderm interactions affect morphogenesis of the left stomach wall.** Frog embryos were injected with GFP mRNA and either control morpholino (Co-MO; **A**) or *pitx2c*-MO (**B-D**), targeted to the left side of the stomach. Top panels: sections through the stomach were stained for  $\beta$ -catenin ( $\beta$ cat; red) and GFP (green). Bottom panels: the same sections were false color-coded as in Fig. 1(b) to highlight the relevant tissue layers (RE, right endoderm; LE, left endoderm; RM, right mesoderm; LM, left mesoderm). In the embryo shown in **A**, Control-MO is distributed throughout the LE and LM of the left stomach wall, which exhibits normal left side tissue architecture. In the embryo shown in **B**, *pitx2c*-MO is distributed throughout the LE and LM, and both tissue layers are abnormally thickened and/or disorganized. In **C**, *pitx2c*-MO is present predominately in the LE, with minimal contribution to the LM; yet, both the LE and LM are abnormal. Likewise, in **D**, *pitx2c*-MO is present only in the LM, with minimal contribution to LE, but both LE and LM are abnormal.
